# Supplementary material for: Immobility responses are induced by photoactivation of single glomerular species responsive to fox odour TMT
Source: Nat Commun. 2017 Jul 7;8:16011. doi: 10.1038/ncomms16011 (PMC5504302; doi:10.1038/ncomms16011)
Supplement: Supplementary Information [file ncomms16011-s1.pdf]

Type of file: PDF  
Size of file: 0 KB  
Title of file for HTML: Supplementary Information  
Description: Supplementary Figures and Supplementary Table

Type of file: MOV  
Size of file: 0 KB  
Title of file for HTML: Supplementary Movie 1  
Description: Three-dimensional computer graphics for Egr1 expression in the AON. KI mice of Olfr1019-ChRWR were photo-illuminated (Photo) with a 2 Hz light for 30 min. Control mice (WT) were exposed to 10% TMT for 30 min. Brain sections were analyzed by immunohistochemistry for the activity dependent expression of Egr1, an immediate-early gene product. Pictures of fluorescence-labeled Egr1 expression in the 20  $\mu$ m sections were taken every 100 $\mu$ m. The volume rendering software (VCAT5) was used to incorporate the pictures and to process the images. Movie is shown for the AON.

Type of file: MOV  
Size of file: 0 KB  
Title of file for HTML: Supplementary Movie 2  
Description: Three-dimensional computer graphics for Egr1 expression in the APC and OT. KI mice of Olfr1019-ChRWR were photo-illuminated (Photo) with a 2 Hz light for 30 min. Control mice (WT) were exposed to 10% TMT for 30 min. Brain sections were analyzed by immunohistochemistry for the activity dependent expression of Egr1, an immediate-early gene product. Pictures of fluorescence-labeled Egr1 expression in the 20  $\mu$ m sections were taken every 100 $\mu$ m. The volume rendering software (VCAT5) was used to incorporate the pictures and to process the images. Movie is shown for the APC and OT.

Type of file: MOV  
Size of file: 0 KB  
Title of file for HTML: Supplementary Movie 3  
Description: Photo-induced responses of the KI mice (5 sec illumination). Photo-illumination, 2 Hz, 250 msec pulses, was given for 5 sec to KI and WT mice. Behaviors after illumination are compared between the KI (Olfr1019-ChRWR) and WT mice.

Type of file: MOV  
Size of file: 0 KB  
Title of file for HTML: Supplementary Movie 4  
Description: Photo-induced responses of the KI mice (1 sec illumination). Photo-illumination, 2 Hz, 250 msec pulses, was given for 1 sec to KI and WT mice. Behaviors after illumination are compared between the KI (Olfr1019-ChRWR) and WT mice.

Type of file: PDF  
Size of file: 0 KB  
Title of file for HTML: Peer Review File  
Description:

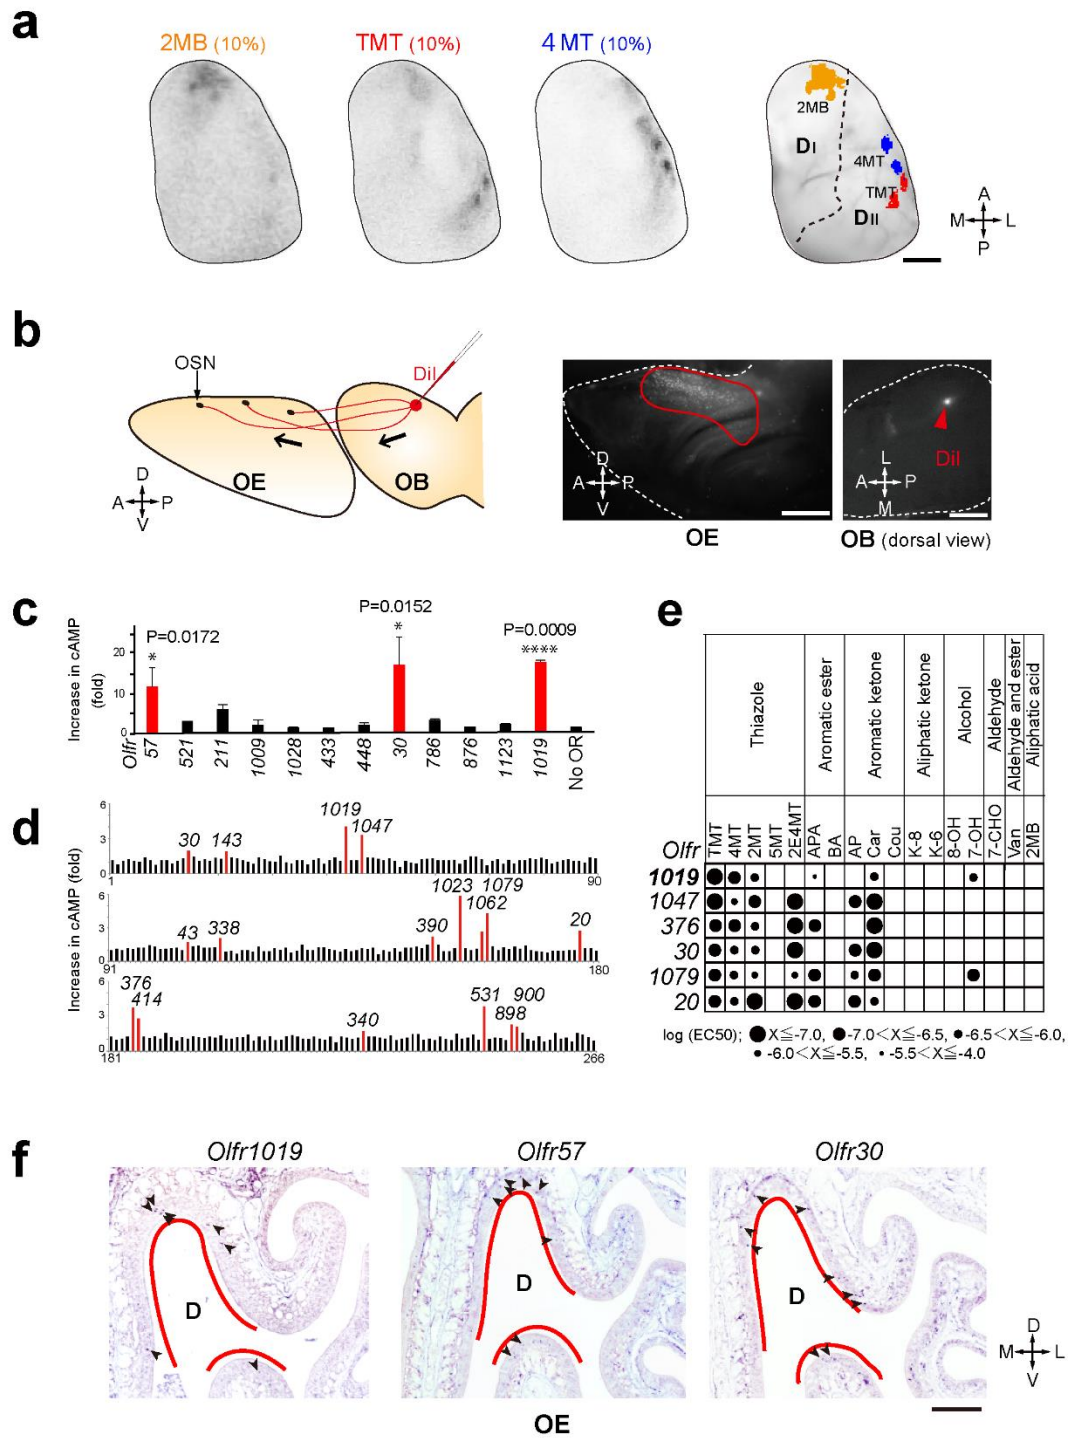

### Supplementary Figure. 1 Isolation of TMT-responsive *OR* genes.

(a) Optical imaging of the dorsal-OB. Activation patterns are compared for three different odorants, 2MB (10%), TMT (10%), and 4MT (10%). Schematic diagrams of imaging patterns are shown (right). A, anterior; P, posterior; M, medial; and L, lateral. Scale bar is 500  $\mu$ m. (b) DiI staining of the OE and OB. DiI was injected into the glomeruli responded to 10% TMT to stain the connecting OSN axons and cell bodies. Scale bars are 500  $\mu$ m. OB, olfactory bulb; OE, olfactory epithelium; A, anterior; P, posterior; M, medial; and L, lateral. (c) The cAMP-induced luciferase assay. Twelve *OR* genes repeatedly isolated from the DiI-labeled OSNs were analyzed for their interactions to TMT by the cAMP dependent luciferase assay. Three ORs (*Olf57*, 30, and 1019) were significantly activated by 1mM TMT and subjected to further analyses. Asterisks indicate T-test. Error bars are  $\pm$ SEM. \* $p < 0.05$ , \*\*  $p < 0.01$ , \*\*\*  $p < 0.001$ . (d) High-throughput screening of TMT-responsive ORs. Separate from the DiI-cloning, a total of 266 published ORs (Supplementary Table 1b) were examined for their binding to TMT. Seventeen ORs (shown in red) demonstrated the significant binding to 1 mM TMT by the luciferase assay. All values in mean  $\pm$ SEM. (e) Ligand selectivity of candidate ORs. Six D-zone ORs that demonstrated high affinity to TMT were analyzed for their binding to 17 different odorants; TMT, 2, 4, 5-trimethyl thiazoline; 4MT, 4-methyl-thiazoline; 2MT, 2methyl-thiazoline; 5MT, 5-methyl-thiazoline; 2E4MT, 2-ethyl-4 methyl-thiazoline; APA, allyl-phenyl-acetate; BA, butyl-acetate; AP, acetophenone; Car, carvone; Cou, coumarine; K-8, octanone; K-6, hexanone; 8-OH, octanol; 7-OH, heptanol; 7-CHO, heptanaldehyde; Van, vanillin; 2MB, 2-methyl-butyric acid. Binding affinities are shown in various sizes of dots. (f) *In situ* hybridization of the OE. D zone-specific *OR* genes, *Olf1019*, 57, and 30, were analyzed. Red lines indicate expression areas in the dorsal zone. Scale bar is 200  $\mu$ m. Arrowheads indicate hybridization signals. D, dorsal; V, ventral; M, medial; and L, lateral.

**a**

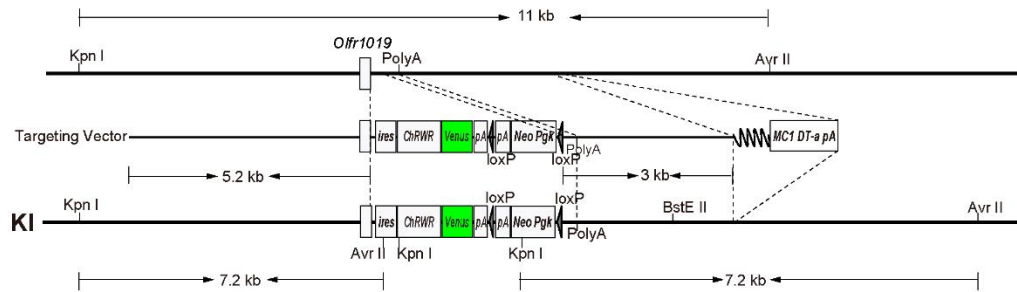

**b**

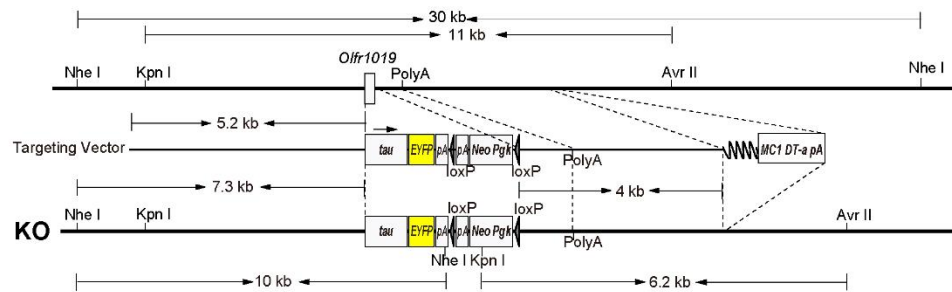

**c**

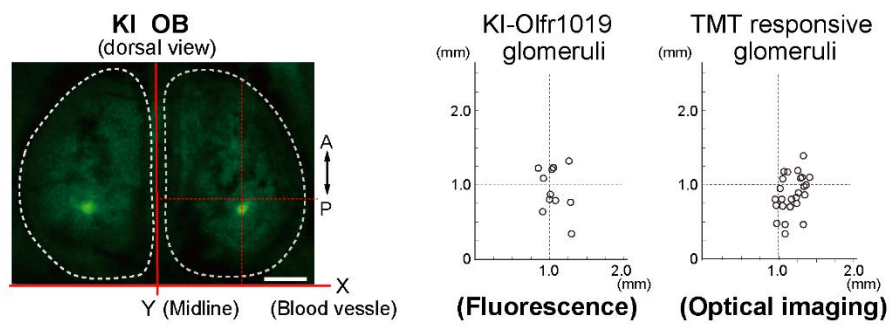

**d**

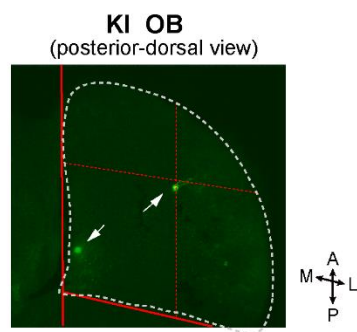

**Supplementary Figure. 2 KI and KO mice for the *OR1019* locus.**

(a) and (b) Plasmid constructs for the KI and KO mice. In the KI-allele of *Olfr1019*, coding sequences for channel-rhodopsin wide receiver (ChRWR) and a fluorescent marker (Venus) are inserted with the *ires* sequence. In the KO allele, the coding sequence of *Olfr1019* was replaced with that of *tau-EYFP*. Restriction-enzyme cleavage sites are shown for *KpnI*, *BstEII*, *AvrII*, and *NheI*. PolyA sites are also shown. (c) Locations of Olfr1019-KI glomeruli (green) were determined based on the midline (Y axis) and blood vessels in the boundary of the OB and neocortex (X axis). n=11. TMT-responsive glomeruli were identified by optical imaging. n=25. Scale bar is 500  $\mu$ m. (d) Detection of Olfr1019 glomeruli in the KI mouse. Olfr1019 gives rise to two glomeruli, one is in the medial and the other is in the dorsal OB. Both are localized in the posterior region of the OB.

**a**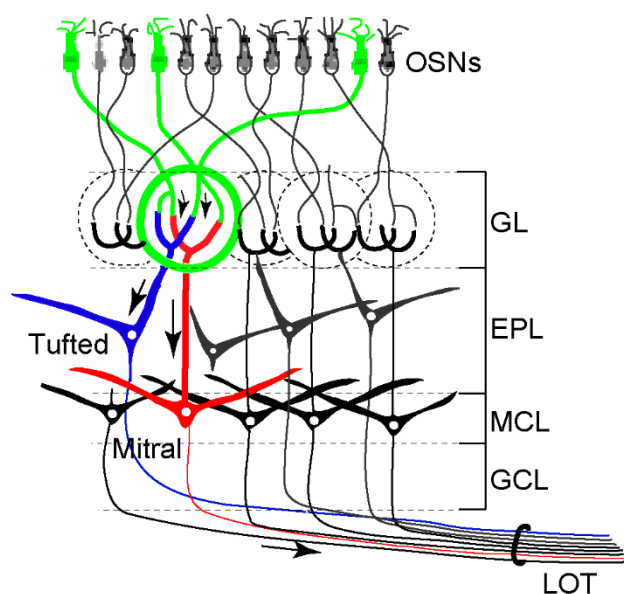**b**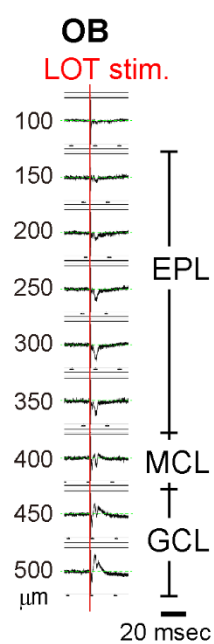**c**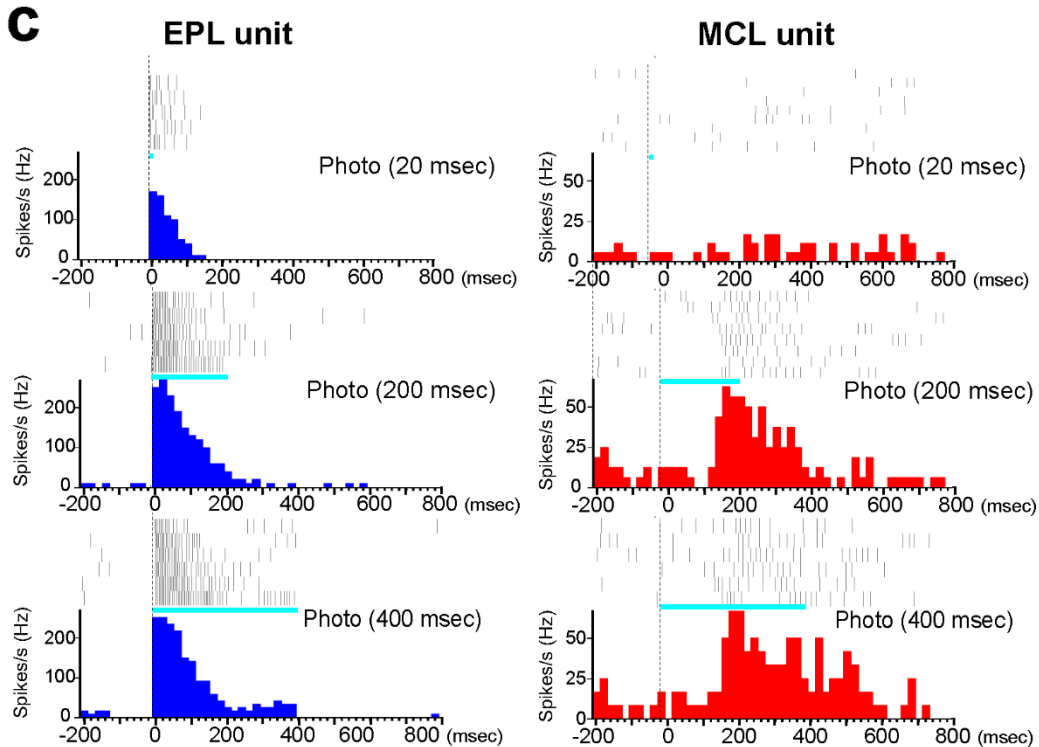

**Supplementary Figure. 3 Single-unit recordings in the KI-OB.**

(a) A schematic diagram of layer structure in the OB. (b) A local field potential (LFP) in the OB. LFP was recorded in the different layers. Location of a microelectrode tip was determined by the configuration of field potentials of mitral and tufted cells. Action potentials were evoked by electric stimulation of the lateral olfactory tract (LOT). EPL, external plexiform layer; MCL, mitral cell layer; GCL, granule cell layer. (c) Light-evoked spike discharges in the EPL and MCL units detected by the single unit recordings. Spike timing and frequencies are shown in raster plots of spike discharges and peristimulus-time histograms. Durations of photo-illumination are indicated by cyan bars. n=5-8.

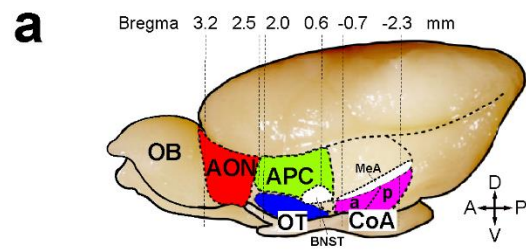

**b**

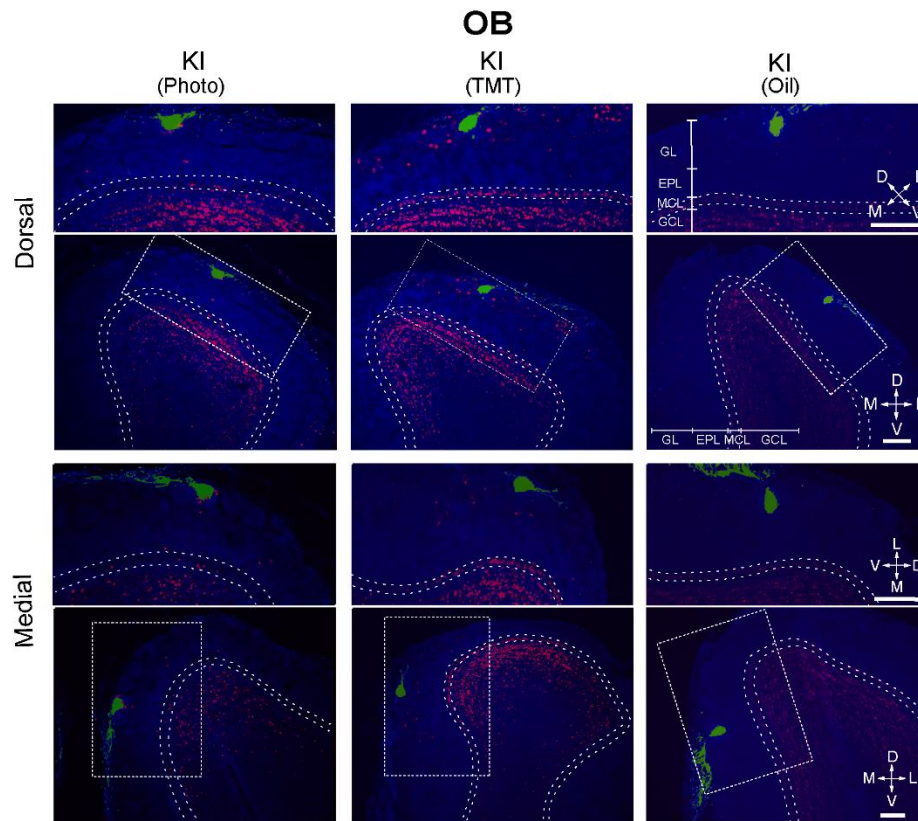

reduced condition

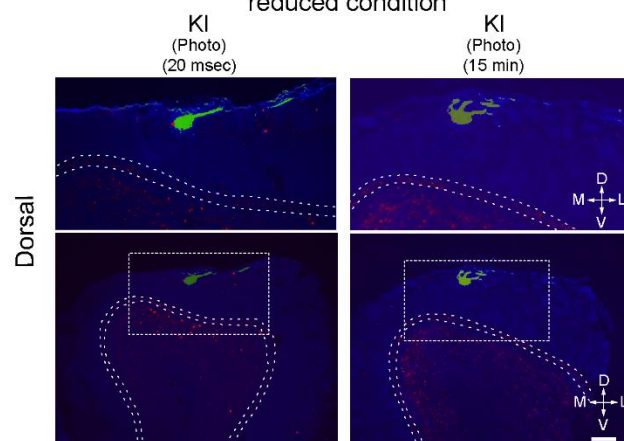

**C**

**AON**

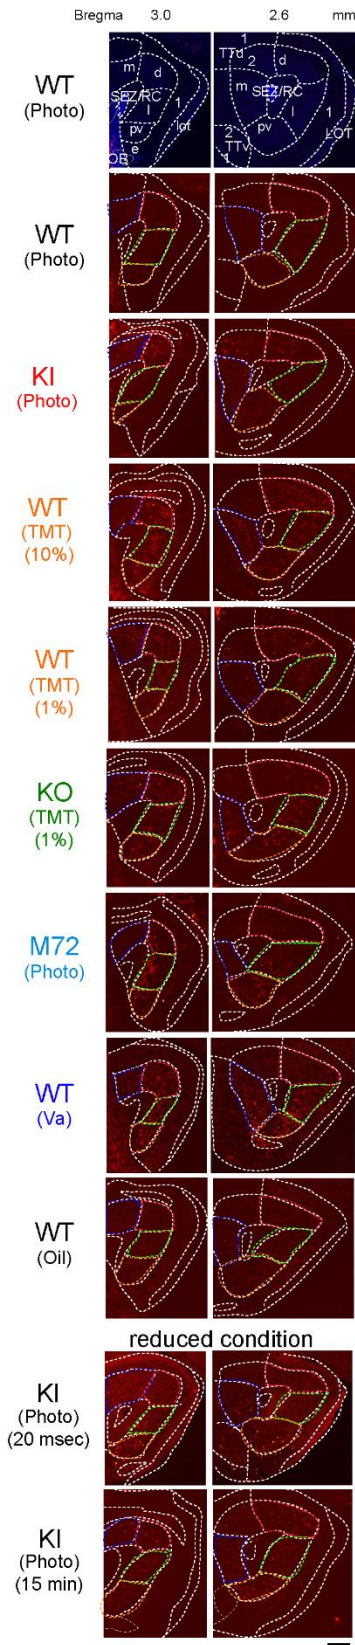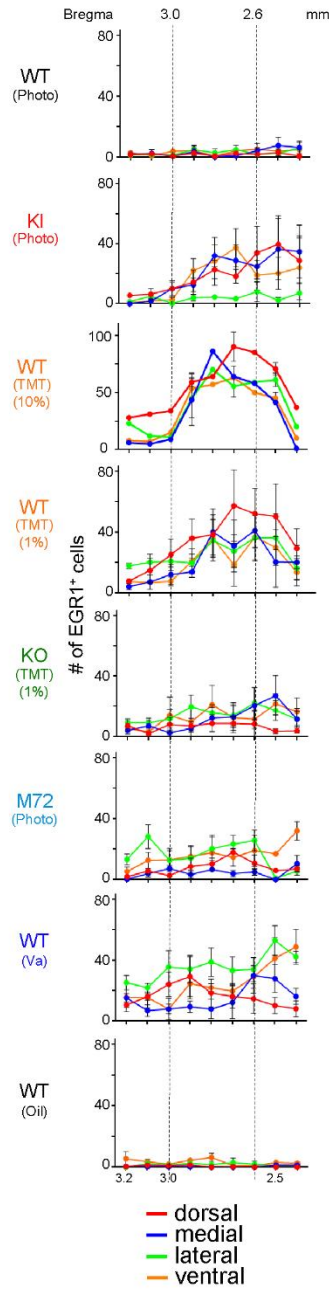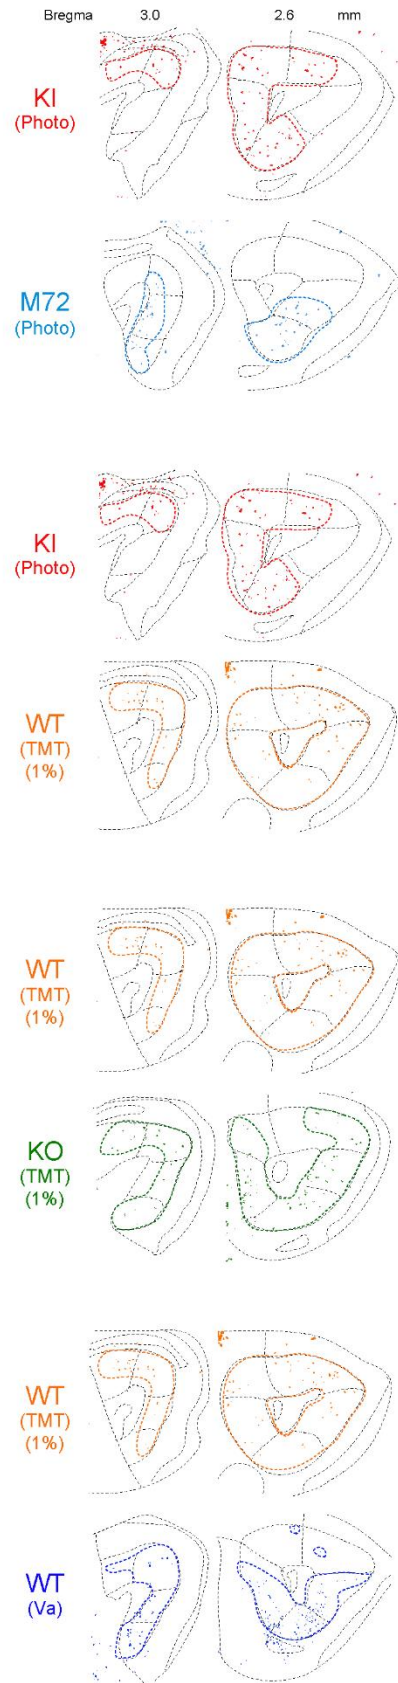

**d**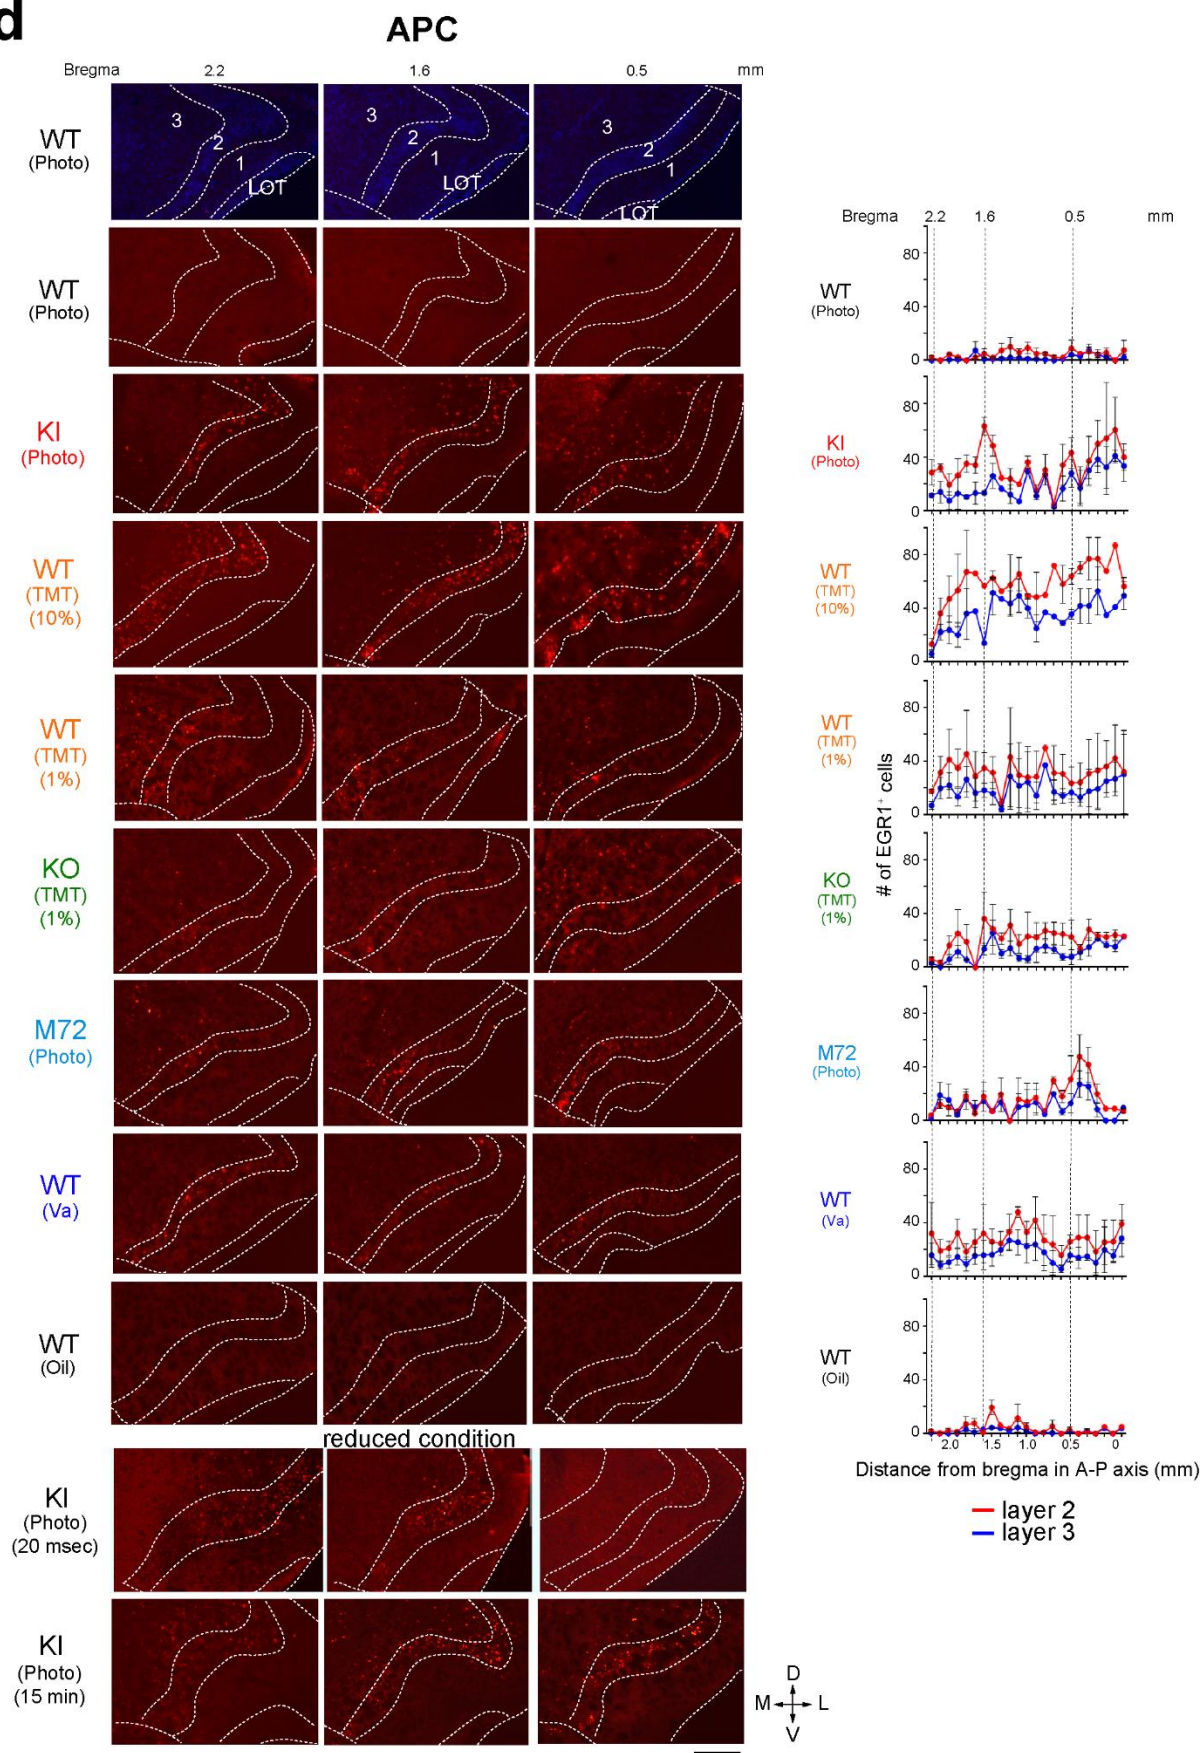

OT

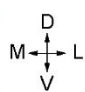

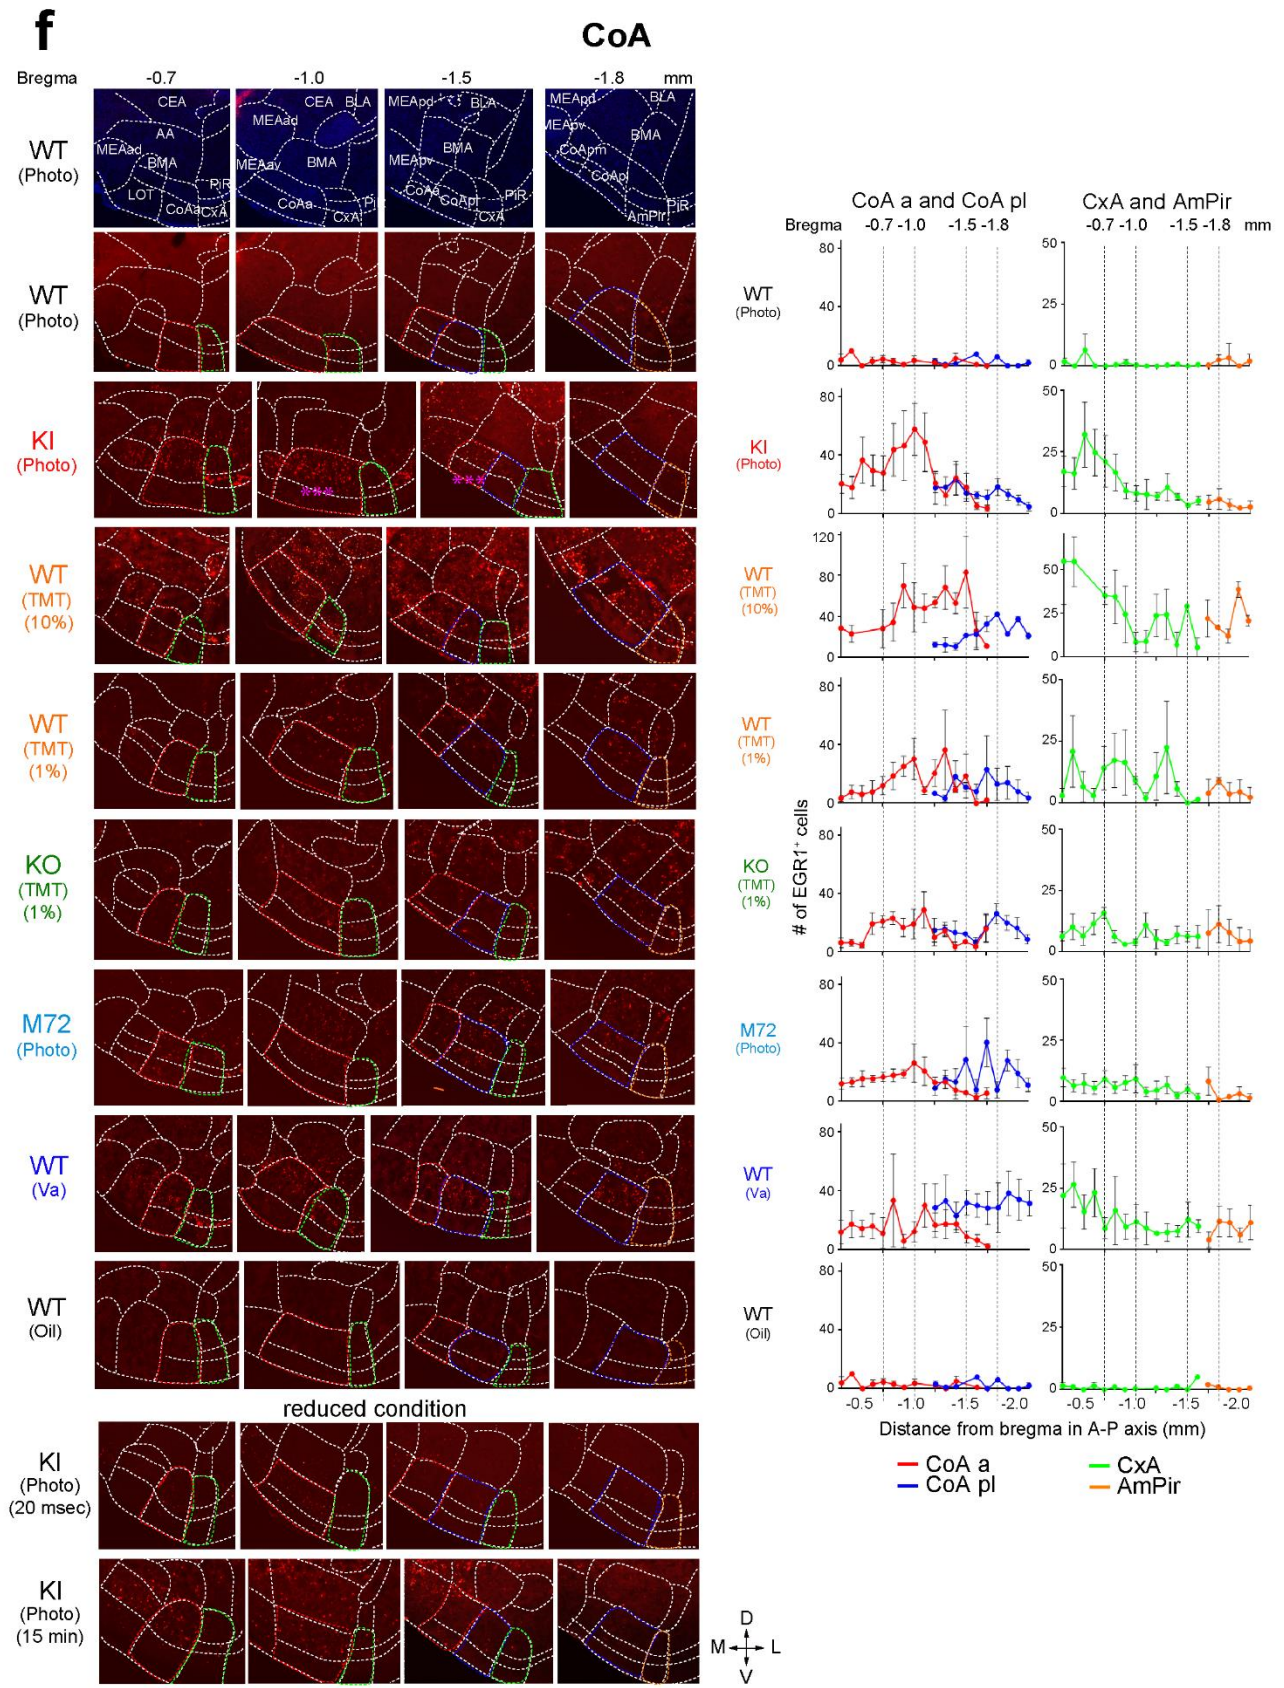

**g****MeA**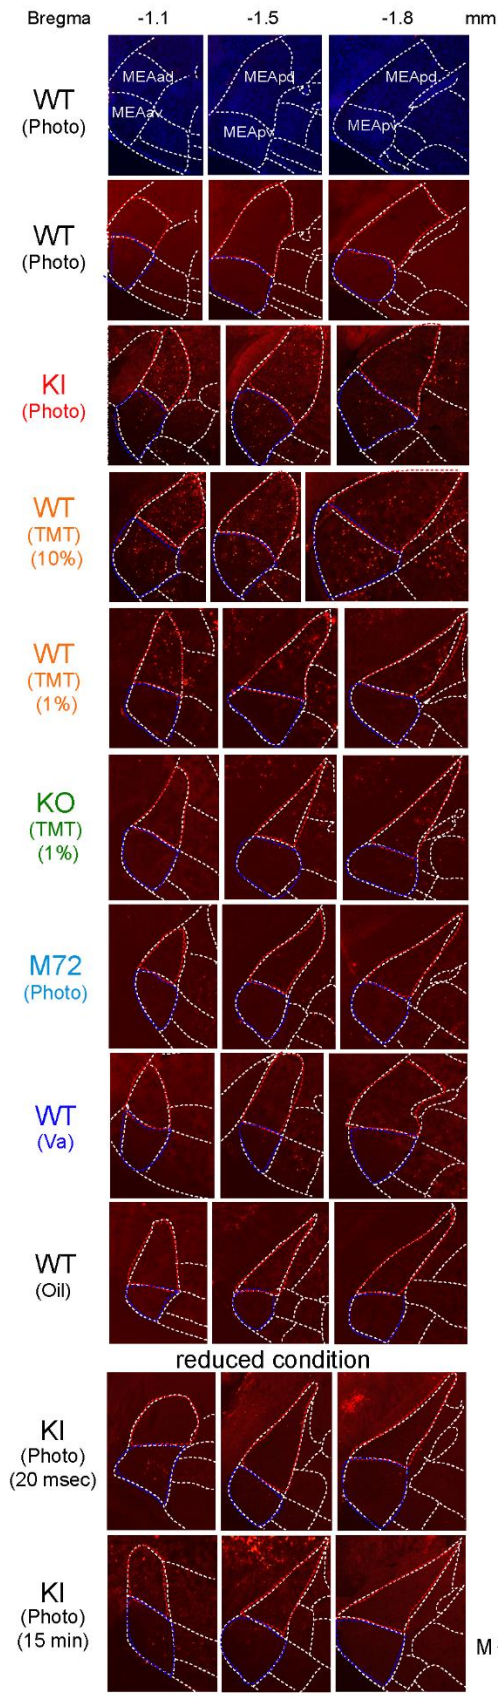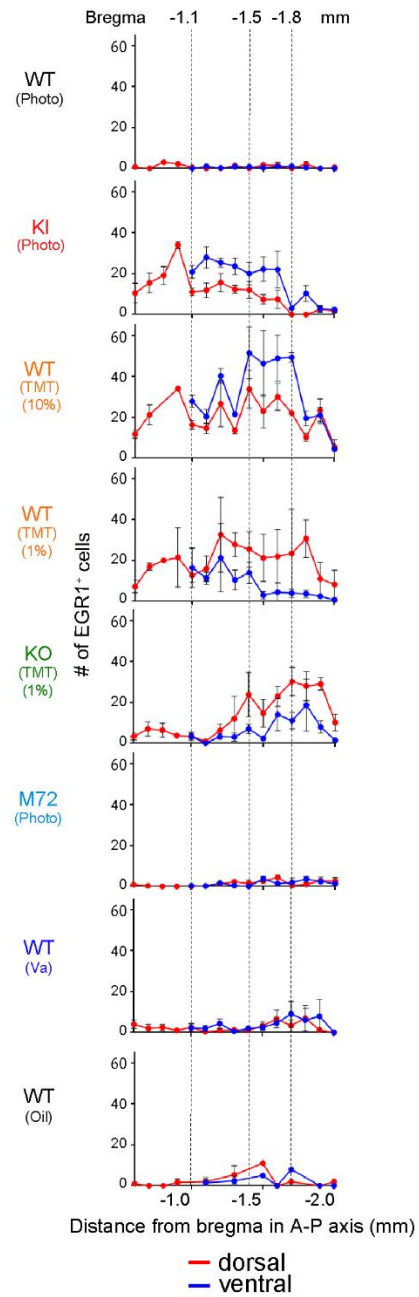

# h

## BNST

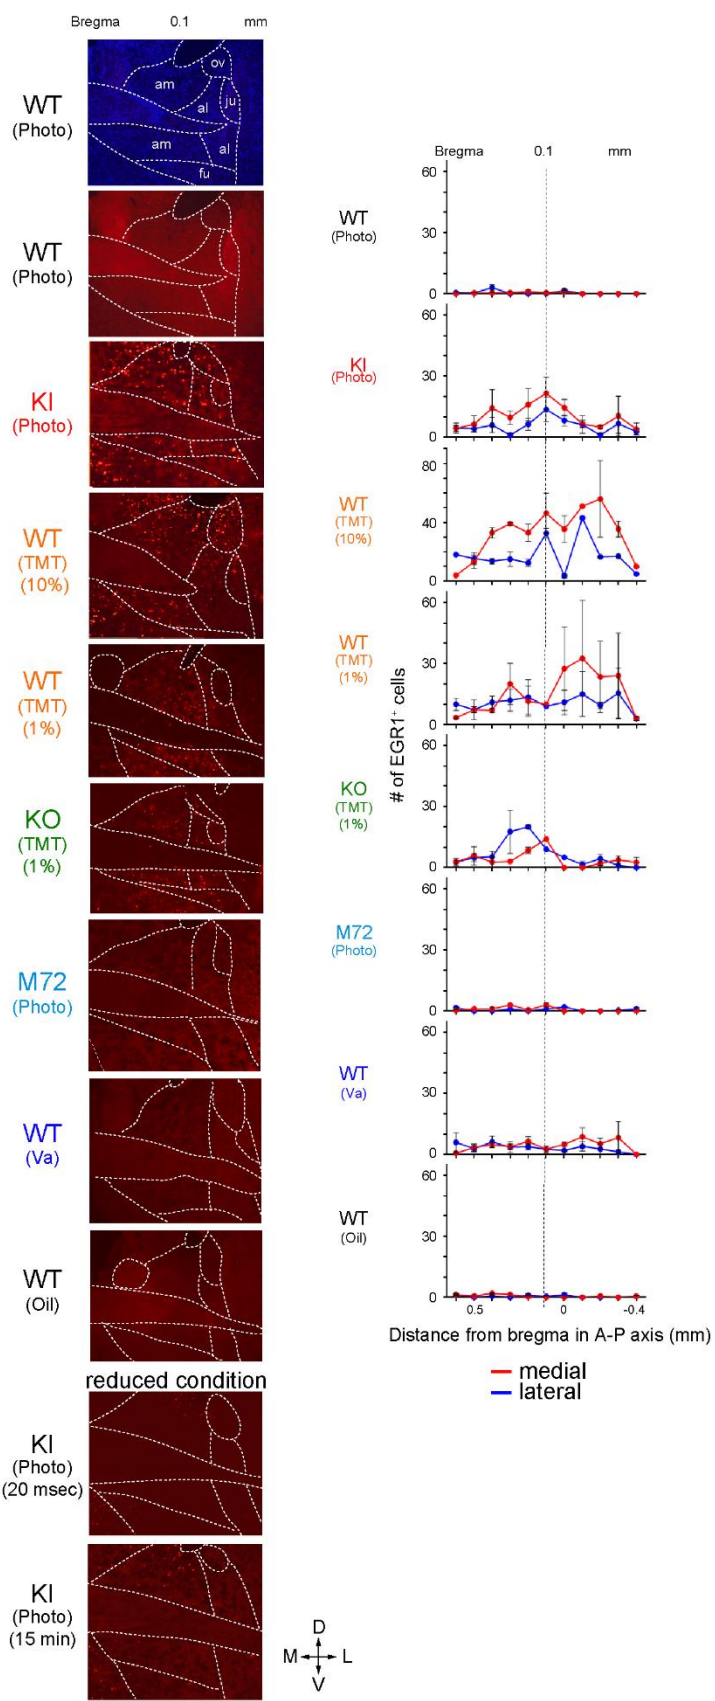

#### **Supplementary Figure. 4 | Immunohistochemistry for Egr1 expression.**

Olfr1019KI, WT, M72-ChR2-YFP mice were photo-illuminated with 2 Hz light of 250 msec pulses. Olfr1019-KO and WT mice were exposed to 1% TMT, 10% TMT, and 10% vanillin (Va). The Olfr1019-KI mice were also treated with reduced condition in photo-illumination (2 Hz light of “20 msec” pulses for 30 min and 2 Hz light of 250 msec pulses for “15 min”). (a) A schematic diagram of the mouse OC. (b) Egr1 expression in the OB. The Olfr1019-KI glomeruli are labeled with Venus in green. Egr1 signals are shown in red. Scale bars are 250  $\mu$ m. GL, glomerular layer; EPL, external plexiform layer; MCL, mitral cell layer; and GCL, granule cell layer. Egr1 expression was also analyzed in the following regions: (c) AON, anterior olfactory nucleus; (d) APC, anterior piriform cortex; (e) OT, olfactory tubercle, (f) CoA, cortical amygdala; (g) MeA, medial amygdala; and (h) BNST, bed nucleus of stria terminalis. All sections were counterstained with DAPI (c-h) to identify brain structures microscopically according to the Paxinos and Franklin’s mouse brain atlas. Egr1 signals were quantified for the AON (c), APC (d), OT (e), CoA (f), MeA (g), and BNST (h). (n=5). Dorsal part, medial part, lateral part, and ventral part of the AON (d, m, l v); 1,2,3, layer 1, 2, and 3; cor, cortical zone; Icj, islands of Calleja; anterior, lateral posterior, and medial posterior cortical amygdala (CoA a, CoA pl, CoA pm); cortex amygdala transition zone (CxA); amygdalo-piriform transition area (AmPir); anterior amygdaloid area (AA); basomedial amygdalar nucleus (BMA); basolateral amygdaloid nucleus (BLA); central amygdala (CeA); piriform cortex (PIR); Anterodorsal, anteroventral, posterodorsal, and posteroventral medial amygdala (MeAad, MeAav, MeApd, and MeApv); anterolateral (al); anteromedial (am); fusiform nucleus (fu); juxta capsular nucleus (ju); oval nucleus (ov). Scale bars are 250  $\mu$ m.

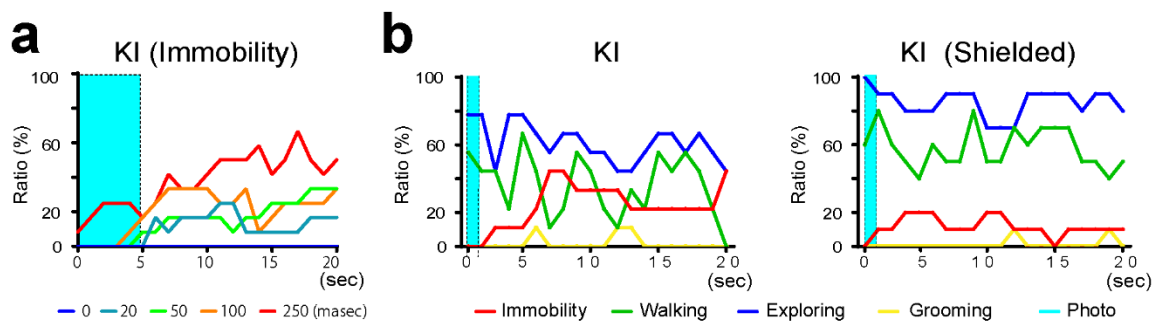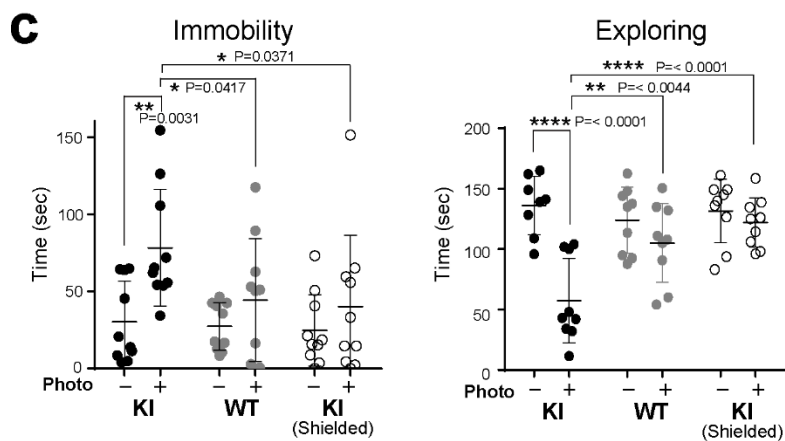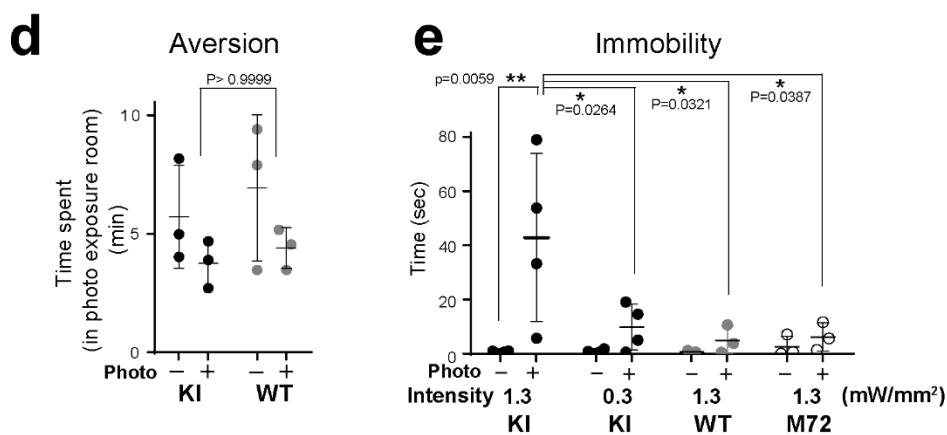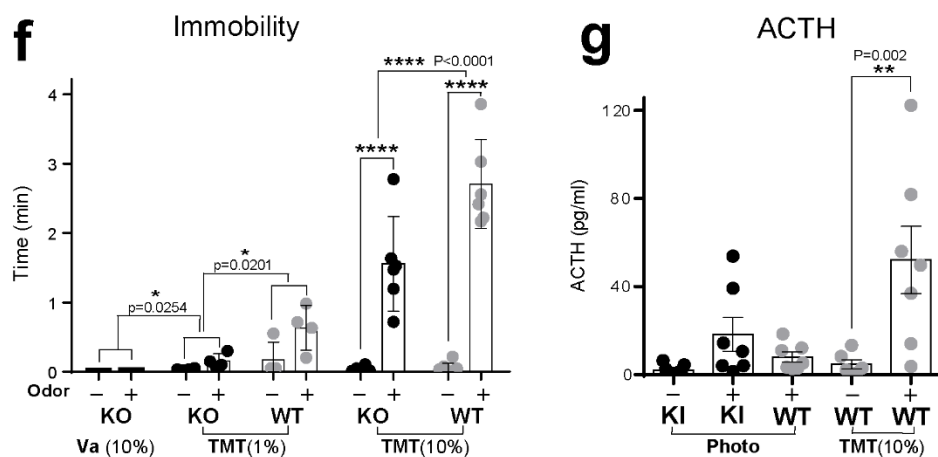

**Supplementary Figure. 5 Behavioral analyses of photo-illuminated KI and TMT exposed KO mice.**

(a) Analyzing the immobility behavior in the different durations of photo-illumination. (b) Time-course studies of photo-stimulated KI and shielded KI mice. For photo-illumination, 2 Hz light of 250 msec pulses for 1 sec (cyan) was given every 20 sec. Ratios of various behaviors are shown.  $n=9$ . (c) Immobility and exploratory behaviors. The KI, WT, and shielded KI mice were analyzed. One-sec of photo-stimulation was given to the mice in every 20 sec. Time spent (sec) for each behavior within 3 min after illumination is shown. Asterisks indicate two-way ANVOA followed by Bonferroni correction.  $*p < 0.05$ ,  $**p < 0.01$ ,  $***p < 0.001$ ,  $****p < 0.0001$ . Error bars are  $\pm$ SD.  $n=9$ . (d) Open-field aversion analyses. Photo-stimulation for 1 sec was given to the mice every 20 sec. KI and WT mice were photo-illuminated in one particular room out of two in a cage. Total time that each animal spent within 10 min in the room where photo-illumination was given ( $n=3$ ). (e) Immobility responses to photo-illumination. Olfr1019-KI WT and M72-YFP-ChR2 (M72) mice were analyzed. Olfr1019-KI with lower intensity ( $0.3 \text{ mW/mm}^2$ ) were also analyzed. Photo-illumination of 2 Hz for 5 sec with a pulse of 250 msec was given every min. Time spent for immobility during a 3-min period of observation was measured. Asterisks indicate two-way ANVOA followed by Bonferroni correction.  $*p < 0.05$ ,  $**p < 0.01$ . Error bars are  $\pm$ SD.  $n=4$  (KI), 3 (WT), and 3 (M72). (f) Immobility responses to 1% and 10% TMT are compared between Olfr1019-KO and WT mice.  $n=4$  (1% TMT) and  $n=5$  (10% TMT). Asterisks indicate two-way ANVOA followed by Bonferroni correction.  $*p < 0.05$ ,  $**p < 0.01$ ,  $****p < 0.0001$ . Error bars are  $\pm$ SD. (g) Quantification of plasma ACTH induced by photo-illumination and TMT exposure. Plasma ACTH was measured in WT and KI mice.  $n=7$ . Average concentrations of plasma ACTH ( $\text{pg/ml} \pm \text{SEM}$ ) are shown.  $P$  values of one-way ANVOA followed by Bonferroni correction are indicated:  $*p < 0.05$ ,  $**p < 0.01$ ,  $****p < 0.0001$ .

**a**

| day 1         | day 2         | day 3         | day 4         | day 5         |
|---------------|---------------|---------------|---------------|---------------|
| Olfr. (freq.) |
| 786 (1)       | 1019 (2)      | 30 (4)        | 521 (4)       | 1028 (3)      |
| 211 (1)       | 433 (2)       | 1028 (4)      | 786 (2)       | 57 (2)        |
|               | 521 (2)       | 876 (3)       | 1123 (2)      | 521 (2)       |
|               | 1123 (1)      | 786 (2)       | 1028 (2)      | 211 (1)       |
|               | 211 (1)       | 521 (2)       | 57 (1)        | 433 (1)       |
|               |               | 1009 (2)      | 448 (1)       | 448 (2)       |

**b**

| No. | Olfr. | No. | Olfr. | No. | Olfr.   | No. | Olfr. | No. | Olfr.    | No. | Olfr.     | No. | Olfr.     |
|-----|-------|-----|-------|-----|---------|-----|-------|-----|----------|-----|-----------|-----|-----------|
| 1   | 1048  | 39  | 920   | 77  | 1030    | 115 | 365   | 153 | 1002     | 191 | 432       | 229 | 342       |
| 2   | 1052  | 40  | 923   | 78  | 1031    | 116 | 395   | 154 | 1010     | 192 | 433       | 230 | 344       |
| 3   | 1054  | 41  | 957   | 79  | 1032    | 117 | 406   | 155 | 1023     | 193 | 435       | 231 | 345       |
| 4   | 1056  | 42  | 969   | 80  | 1034    | 118 | 410   | 156 | 1028     | 194 | 437       | 232 | 346       |
| 5   | 1104  | 43  | 974   | 81  | 1036    | 119 | 478   | 157 | 1035-ps1 | 195 | 438       | 233 | 347       |
| 6   | 1106  | 44  | 1019  | 82  | 1043    | 120 | 483   | 158 | 1046     | 196 | 441       | 234 | 348       |
| 7   | 1154  | 45  | 1044  | 83  | 1045    | 121 | 484   | 159 | 1062     | 197 | 448       | 235 | 350       |
| 8   | 1155  | 46  | 1045  | 84  | 1086    | 122 | 488   | 160 | 1079     | 198 | 477       | 236 | 352       |
| 9   | 1176  | 47  | 1047  | 85  | 1170    | 123 | 490   | 161 | 1140     | 199 | 816       | 237 | 378       |
| 10  | 1339  | 48  | 1497  | 86  | 1357    | 124 | 605   | 162 | 1157     | 200 | 877       | 238 | 380       |
| 11  | 1377  | 49  | 23    | 87  | 1361    | 125 | 739   | 163 | 1160     | 201 | 895       | 239 | 381       |
| 12  | 1404  | 50  | 52    | 88  | 1500    | 126 | 746   | 164 | 1215     | 202 | 922       | 240 | 382       |
| 13  | 1406  | 51  | 141   | 89  | 430     | 127 | 748   | 165 | 1219     | 203 | 933       | 241 | 385       |
| 14  | 3     | 52  | 145   | 90  | 822     | 128 | 767   | 166 | 1225     | 204 | 970       | 242 | 386       |
| 15  | 30    | 53  | 150   | 91  | 815     | 129 | 768   | 167 | 1317     | 205 | 982       | 243 | 389       |
| 16  | 38    | 54  | 247   | 92  | 73      | 130 | 780   | 168 | 1366     | 206 | 1036      | 244 | 979       |
| 17  | 57    | 55  | 368   | 93  | 811     | 131 | 784   | 169 | 1389     | 207 | 1039/1517 | 245 | 392       |
| 18  | 807   | 56  | 420   | 94  | 1358    | 132 | 792   | 170 | 1410     | 208 | 1133      | 246 | 393       |
| 19  | 133   | 57  | 446   | 95  | 965     | 133 | 798   | 171 | 1449     | 209 | 1156      | 247 | 394       |
| 20  | 134   | 58  | 456   | 96  | 16      | 134 | 805   | 172 | 1496     | 210 | 1167      | 248 | 395       |
| 21  | 139   | 59  | 506   | 97  | 480     | 135 | 809   | 173 | 1451     | 211 | 1168      | 249 | 531       |
| 22  | 143   | 60  | 521   | 98  | 19      | 136 | 812   | 174 | 1510     | 212 | 1328/1519 | 250 | 527       |
| 23  | 146   | 61  | 510   | 99  | 918     | 137 | 813   | 175 | 1512     | 213 | 1329      | 251 | 845       |
| 24  | 147   | 62  | 523   | 100 | 1510    | 138 | 821   | 176 | 814      | 214 | 1362      | 252 | 862       |
| 25  | 160   | 63  | 810   | 101 | 1511    | 139 | 876   | 177 | 20/21    | 215 | 1395      | 253 | 894       |
| 26  | 763   | 64  | 960   | 102 | 151     | 140 | 881   | 178 | 50       | 216 | 1396      | 254 | 898       |
| 27  | 355   | 65  | 937   | 103 | 482     | 141 | 884   | 179 | 62       | 217 | 1403      | 255 | 900       |
| 28  | 411   | 66  | 938   | 104 | 1162    | 142 | 919   | 180 | 74       | 218 | 1408      | 256 | 944       |
| 29  | 424   | 67  | 958   | 105 | 43/403  | 143 | 926   | 181 | 146      | 219 | 1445      | 257 | 980       |
| 30  | 473   | 68  | 959   | 106 | 49      | 144 | 934   | 182 | 218      | 220 | 1504      | 258 | 1022      |
| 31  | 481   | 69  | 973   | 107 | 54      | 145 | 935   | 183 | 239      | 221 | 55        | 259 | 1058      |
| 32  | 508   | 70  | 994   | 108 | 132     | 146 | 961   | 184 | 332      | 222 | 312       | 260 | 1061/1513 |
| 33  | 738   | 71  | 987   | 109 | 221     | 147 | 972   | 185 | 376      | 223 | 1         | 261 | 1065      |
| 34  | 749   | 72  | 988   | 110 | 313     | 148 | 976   | 186 | 414      | 224 | 228       | 262 | 1066      |
| 35  | 826   | 73  | 1009  | 111 | 338     | 149 | 978   | 187 | 419      | 225 | 255       | 263 | 1076      |
| 36  | 875   | 74  | 1020  | 112 | 348     | 150 | 390   | 188 | 421      | 226 | 339       | 264 | 1089      |
| 37  | 878   | 75  | 1026  | 113 | 350     | 151 | 984   | 189 | 426      | 227 | 340       | 265 | 1090      |
| 38  | 904   | 76  | 1029  | 114 | 364-ps1 | 152 | 992   | 190 | 429      | 228 | 341       | 266 | 1352      |

**Supplementary Table 1 | Lists of OR gene clones.**

(a) OR clones isolated from DiI-labeling. Isolation frequencies are shown for each *OR* gene clone. ORs that responded to 1mM TMT are marked in red. (b) *OR* gene clones analyzed by highthroughput screening. ORs that responded to 1 mM TMT are marked in red (dorsal-zone clones) or blue (ventral-zone clones).
